# Supplementary material for: Biomarker Identification, Safety, and Efficacy of High-Dose Antioxidants for Adrenomyeloneuropathy: a Phase II Pilot Study
Source: Springer Nature journal article supplement (doi:10.1007/s13311-019-00735-2), 2019-05-10
Supplement: MOESM2 [file 25806902]

**Table 1. Diagnostic data**

|                 | Pathogenic Variants | AMN Pre-treatment (% of total fatty acids) |               |               |                |                 |              |               | AMN Post-treatment (% of total fatty acids) |               |               |                |                 |              |               |
|-----------------|---------------------|--------------------------------------------|---------------|---------------|----------------|-----------------|--------------|---------------|---------------------------------------------|---------------|---------------|----------------|-----------------|--------------|---------------|
|                 |                     | C22:0                                      | C24:0         | C26:0         | C28:0          | C30:0           | C24:1(n-9)   | C26:1(n-9)    | C22:0                                       | C24:0         | C26:0         | C28:0          | C30:0           | C24:1(n-9)   | C26:1(n-9)    |
| EC-001          | p.Arg401Gln         | 0.67%                                      | 1.12%         | 0.052%        | 0.0063%        | 0.0013%         | 1.38%        | 0.024%        | 0.70%                                       | 1.13%         | 0.049%        | 0.0065%        | 0.0016%         | 1.57%        | 0.028%        |
| EC-002          | p.Arg554His         | 0.48%                                      | 0.87%         | 0.042%        | 0.0048%        | 0.0011%         | 1.10%        | 0.026%        | 0.49%                                       | 0.83%         | 0.043%        | 0.0045%        | 0.0015%         | 1.05%        | 0.026%        |
| EC-003          | p.Val457fs*         | 0.71%                                      | 1.20%         | 0.049%        | 0.0054%        | 0.0018%         | 0.75%        | 0.014%        | 0.73%                                       | 1.16%         | 0.050%        | 0.0064%        | 0.0017%         | 0.65%        | 0.013%        |
| EC-004          | p.Tyr174Cys         | 0.75%                                      | 1.25%         | 0.057%        | 0.0080%        | 0.0021%         | 0.95%        | 0.019%        | 0.75%                                       | 1.22%         | 0.056%        | 0.0074%        | 0.0011%         | 0.98%        | 0.020%        |
| EC-005          | p.Tyr181Cys         | 0.78%                                      | 1.24%         | 0.043%        | 0.0057%        | 0.0016%         | 0.86%        | 0.012%        | 0.63%                                       | 0.98%         | 0.042%        | 0.0054%        | 0.0018%         | 0.55%        | 0.011%        |
| EC-006          | p.Val102Glu         | 0.62%                                      | 1.02%         | 0.039%        | 0.0039%        | 0.0009%         | 0.62%        | 0.013%        | 0.63%                                       | 1.09%         | 0.045%        | 0.0047%        | 0.0008%         | 0.62%        | 0.014%        |
| EC-007          | p.Ser108Ter         | 0.79%                                      | 1.52%         | 0.059%        | 0.0071%        | 0.0010%         | 0.96%        | 0.020%        | 0.74%                                       | 1.35%         | 0.054%        | 0.0054%        | 0.0015%         | 0.79%        | 0.016%        |
| EC-008          | p.Gly277Arg         | 0.73%                                      | 1.08%         | 0.045%        | 0.0111%        | 0.0049%         | 1.31%        | 0.022%        | 0.86%                                       | 1.37%         | 0.054%        | 0.0095%        | 0.0028%         | 1.04%        | 0.017%        |
| EC-009          | p.Leu628Pro         | 0.44%                                      | 0.86%         | 0.048%        | 0.0048%        | 0.0011%         | 0.63%        | 0.014%        | 0.72%                                       | 1.34%         | 0.059%        | 0.0062%        | 0.0012%         | 0.68%        | 0.017%        |
| EC-010          | p.Arg617Leu         | 0.58%                                      | 1.23%         | 0.080%        | 0.0119%        | 0.0024%         | 1.25%        | 0.036%        | 0.77%                                       | 1.45%         | 0.073%        | 0.0101%        | 0.0023%         | 1.46%        | 0.037%        |
| EC-011          | p.Arg389Gly         | 0.75%                                      | 1.24%         | 0.043%        | 0.0047%        | 0.0013%         | 0.88%        | 0.014%        | 0.89%                                       | 1.51%         | 0.052%        | 0.0044%        | 0.0013%         | 0.86%        | 0.013%        |
| EC-012          | p.Arg389Gly         | 0.91%                                      | 1.17%         | 0.037%        | 0.0044%        | 0.0010%         | 0.86%        | 0.012%        | 0.89%                                       | 1.18%         | 0.030%        | 0.0037%        | 0.0014%         | 0.97%        | 0.014%        |
| EC-013          | p.Tyr181Ter         | 0.72%                                      | 1.21%         | 0.057%        | 0.0071%        | 0.0016%         | 1.07%        | 0.018%        | 0.78%                                       | 1.41%         | 0.065%        | 0.0076%        | 0.0021%         | 0.95%        | 0.022%        |
| <b>CONTROLS</b> |                     |                                            |               |               |                |                 |              |               |                                             |               |               |                |                 |              |               |
| media (n=13)    |                     | <b>0.873%</b>                              | <b>0.818%</b> | <b>0.010%</b> | <b>0.0010%</b> | <b>0.00003%</b> | <b>1.05%</b> | <b>0.006%</b> | <b>0.873%</b>                               | <b>0.818%</b> | <b>0.010%</b> | <b>0.0010%</b> | <b>0.00003%</b> | <b>1.05%</b> | <b>0.006%</b> |
| SD              |                     | 0.054                                      | 0.051         | 0.000350      | 0.000094       | 0.000031        | 0.042        | 0.00036       | 0.054                                       | 0.051         | 0.000350      | 0.000094       | 0.000031        | 0.042        | 0.00036       |

\*Novel pathogenic variant

**Table 2a. Evoked potential data.** BAEP=Brainstem Auditory Evoked Potential; SEP=Somatosensory Evoked Potential; MEP=Motor Evoked Potential; LEP=Laser Evoked Potential ;pre=pre- treatment; post=post-treatment; R=right; L=left; NR=no response; in bold: abnormal values; CMCT=central motor conduction time; ND: not done; in bold= abnormal values

| ID                                              | AGE | SIDE | MEP (ms)     |              | MEP (ms)     |              | BAEP (ms)   |             |             |             |             |             | LEP (ms)        |      |               |            | VEP (70°)     |            |               |              |                |      |
|-------------------------------------------------|-----|------|--------------|--------------|--------------|--------------|-------------|-------------|-------------|-------------|-------------|-------------|-----------------|------|---------------|------------|---------------|------------|---------------|--------------|----------------|------|
|                                                 |     |      | CMCT         | CMCT         | CMCT         | CMCT         | I-III       |             | III-V       |             | I-V         |             | TRIG N2/P2 (ms) |      | UL N2/P2 (ms) |            | LL N2/P2 (ms) |            | P100 lat (ms) |              | P100 ampl (µV) |      |
|                                                 |     |      | pre          | post         | pre          | post         | pre         | post        | pre         | post        | pre         | post        | pre             | post | pre           | post       | pre           | post       | pre           | post         | pre            | post |
| 1                                               | 24  | R    | <b>25.8</b>  | <b>34.1</b>  | <b>10.9</b>  | <b>10.9</b>  | <b>3.2</b>  | <b>2.94</b> | <b>2.84</b> | <b>2.9</b>  | <b>6.04</b> | <b>5.84</b> | 181             | 171  | 216           | 220        | <b>336</b>    | <b>324</b> | 96.5          | 98.5         | 15.2           | 14   |
|                                                 |     | L    | <b>29.7</b>  | <b>32.8</b>  | <b>9.42</b>  | <b>9.2</b>   | <b>2.78</b> | <b>2.68</b> | <b>3.16</b> | <b>2.94</b> | <b>5.94</b> | <b>5.62</b> | 171             | 176  | 222           | 218        | <b>301</b>    | <b>350</b> | 92.5          | 99           | 14             | 15.3 |
| 2                                               | 48  | R    | <b>22.05</b> | <b>20</b>    | <b>7.6</b>   | 5.6          | <b>2.56</b> | <b>2.68</b> | 2.02        | 2           | <b>4.58</b> | <b>4.68</b> | 176             | 162  | 220           | 222        | 260           | 278        | 104.5         | 104.5        | 18.9           | 19.6 |
|                                                 |     | L    | <b>20.05</b> | <b>17</b>    | <b>7.9</b>   | 6.82         | <b>2.64</b> | <b>2.5</b>  | 1.92        | 2           | 4.56        | 4.5         | 178             | 176  | 213           | 216        | 250           | 258        | 101.5         | 102          | 20.1           | 24.5 |
| 3                                               | 35  | R    | <b>22.02</b> | <b>18.62</b> | <b>7.3</b>   | <b>8.52</b>  | <b>2.9</b>  | <b>3.1</b>  | <b>2.46</b> | <b>2.58</b> | <b>5.36</b> | <b>5.68</b> | 173             | 164  | 222           | 230        | 232           | 252        | 101           | 101.5        | 5              | 7.4  |
|                                                 |     | L    | <b>20.5</b>  | <b>20.05</b> | 5.77         | <b>7.25</b>  | <b>2.94</b> | <b>3.02</b> | <b>2.5</b>  | <b>2.4</b>  | <b>5.44</b> | <b>5.42</b> | 178             | 163  | 228           | 215        | 251           | 248        | 101           | 99.5         | 8.2            | 5.8  |
| 4                                               | 44  | R    | <b>20.7</b>  | <b>17.25</b> | <b>8.2</b>   | 6.5          | <b>2.54</b> | <b>2.68</b> | <b>3.14</b> | <b>2.94</b> | <b>5.68</b> | <b>5.62</b> | 156             | 155  | 202           | 214        | 254           | 251        | 108.5         | 108          | 24.3           | 24.1 |
|                                                 |     | L    | <b>19.9</b>  | <b>18.8</b>  | <b>8.3</b>   | 6.1          | <b>3.08</b> | <b>3.02</b> | <b>2.92</b> | <b>2.88</b> | <b>6</b>    | <b>5.9</b>  | 155             | 153  | 210           | 208        | 259           | 247        | 108           | 104.5        | 21             | 24.6 |
| 5                                               | 45  | R    | <b>22.5</b>  | <b>23.8</b>  | <b>8.7</b>   | <b>9.8</b>   | <b>3.04</b> | <b>3</b>    | <b>2.58</b> | <b>2.66</b> | <b>5.62</b> | <b>5.66</b> | 198             | 189  | 233           | <b>263</b> | <b>NR</b>     | <b>NR</b>  | 98            | 102          | 13.7           | 17.2 |
|                                                 |     | L    | <b>23.8</b>  | <b>19.6</b>  | <b>12.2</b>  | <b>10.5</b>  | <b>2.7</b>  | <b>3</b>    | <b>2.5</b>  | <b>2.42</b> | <b>5.2</b>  | <b>5.4</b>  | 198             | 190  | 229           | <b>267</b> | <b>NR</b>     | <b>NR</b>  | 99.5          | 101          | 10             | 17   |
| 6                                               | 37  | R    | <b>NR</b>    | <b>28.7</b>  | <b>11.8</b>  | <b>11.5</b>  | <b>3.12</b> | <b>3.12</b> | <b>2.96</b> | <b>2.8</b>  | <b>6.08</b> | <b>5.92</b> | <b>246</b>      | 191  | <b>280</b>    | <b>264</b> | <b>NR</b>     | <b>NR</b>  | <b>118</b>    | <b>115</b>   | 2.3            | 1.7  |
|                                                 |     | L    | <b>NR</b>    | <b>23.1</b>  | <b>9.7</b>   | <b>8.22</b>  | <b>3.1</b>  | <b>3.18</b> | <b>3.04</b> | <b>2.82</b> | <b>6.14</b> | <b>6</b>    | <b>245</b>      | 205  | <b>277</b>    | <b>259</b> | <b>NR</b>     | <b>NR</b>  | <b>114.5</b>  | <b>118</b>   | 3.9            | 2.1  |
| 7                                               | 50  | R    | <b>23.9</b>  | <b>20.45</b> | <b>8.52</b>  | <b>8.25</b>  | 2.4         | 2.4         | 2.32        | <b>2.38</b> | <b>4.72</b> | <b>4.78</b> | 197             | 197  | <b>265</b>    | <b>268</b> | <b>NR</b>     | <b>NR</b>  | 102           | 104          | 14.8           | 10.4 |
|                                                 |     | L    | <b>21.6</b>  | <b>21.6</b>  | <b>8.25</b>  | <b>7.6</b>   | <b>2.78</b> | <b>2.52</b> | 2.2         | 2.28        | <b>5</b>    | <b>4.8</b>  | 185             | 186  | <b>273</b>    | 252        | <b>NR</b>     | <b>NR</b>  | 104           | 103.5        | 13.8           | 10.4 |
| 8                                               | 41  | R    | <b>27.4</b>  | <b>30.12</b> | <b>10.35</b> | <b>13.35</b> | <b>3</b>    | <b>3.04</b> | <b>2.82</b> | <b>2.82</b> | <b>5.82</b> | <b>5.86</b> | 209             | 198  | <b>268</b>    | 237        | <b>389</b>    | <b>345</b> | 105           | 108.5        | 8.9            | 17.4 |
|                                                 |     | L    | <b>27.6</b>  | <b>31.52</b> | <b>9.75</b>  | <b>8.65</b>  | <b>3.22</b> | <b>2.92</b> | <b>2.88</b> | <b>2.98</b> | <b>6.1</b>  | <b>5.9</b>  | 199             | 196  | <b>262</b>    | 245        | <b>333</b>    | <b>388</b> | 102           | 107.5        | 20.7           | 16.9 |
| 9                                               | 28  | R    | <b>29.4</b>  | <b>26.65</b> | <b>8.9</b>   | <b>8.85</b>  | <b>2.8</b>  | <b>2.82</b> | <b>2.54</b> | <b>2.5</b>  | <b>5.34</b> | <b>5.32</b> | 159             | 158  | 198           | 194        | <b>361</b>    | <b>347</b> | <b>131</b>    | <b>115.9</b> | 2.5            | 3.9  |
|                                                 |     | L    | <b>26.25</b> | <b>25.8</b>  | <b>9.02</b>  | <b>9.3</b>   | <b>2.9</b>  | <b>3</b>    | <b>2.62</b> | <b>2.46</b> | <b>5.52</b> | <b>5.46</b> | 167             | 179  | 187           | 194        | <b>357</b>    | <b>349</b> | <b>121</b>    | <b>121.5</b> | 6.8            | 6.3  |
| 10                                              | 38  | R    | <b>24.6</b>  | <b>20.15</b> | <b>9.85</b>  | <b>8.35</b>  | 2.24        | <b>2.92</b> | <b>2.92</b> | <b>2.64</b> | <b>5.88</b> | <b>5.56</b> | <b>232</b>      | 201  | <b>275</b>    | 225        | <b>318</b>    | 277        | 107           | <b>110.5</b> | 6.3            | 5.4  |
|                                                 |     | L    | <b>25.4</b>  | <b>22.32</b> | <b>11.6</b>  | <b>9.82</b>  | <b>2.86</b> | <b>2.86</b> | <b>2.6</b>  | <b>2.64</b> | <b>5.46</b> | <b>5.5</b>  | <b>237</b>      | 199  | <b>256</b>    | 225        | <b>290</b>    | 255        | 106           | <b>110</b>   | 8.1            | 9.6  |
| 11                                              | 37  | R    | <b>25.65</b> | <b>24.1</b>  | <b>9.55</b>  | <b>9.5</b>   | <b>2.76</b> | <b>2.81</b> | <b>2.7</b>  | <b>2.9</b>  | <b>5.46</b> | <b>5.71</b> | 176             | 171  | 231           | 220        | <b>NR</b>     | <b>NR</b>  | 106.5         | 109.5        | 12.3           | 14.4 |
|                                                 |     | L    | <b>NR</b>    | <b>28.9</b>  | <b>8.45</b>  | <b>8.12</b>  | <b>2.8</b>  | <b>2.85</b> | <b>2.52</b> | <b>2.98</b> | <b>5.32</b> | <b>5.83</b> | 190             | 197  | 219           | 213        | <b>NR</b>     | <b>NR</b>  | 107           | 105.5        | 12.7           | 13   |
| 12                                              | 64  | R    | <b>17.07</b> | <b>19.8</b>  | <b>7.95</b>  | <b>8.8</b>   | <b>2.72</b> | <b>2.78</b> | <b>2.42</b> | 2.24        | <b>5.14</b> | <b>5.02</b> | 180             | 177  | 245           | 246        | <b>NR</b>     | <b>NR</b>  | <b>111</b>    | <b>112</b>   | 18.6           | 15.6 |
|                                                 |     | L    | <b>17.07</b> | <b>17.8</b>  | <b>8.1</b>   | <b>8.2</b>   | 2.42        | <b>2.58</b> | <b>2.44</b> | 2.14        | <b>4.86</b> | <b>4.72</b> | 162             | 176  | 236           | 238        | <b>NR</b>     | <b>NR</b>  | <b>114.5</b>  | <b>116.5</b> | 18.3           | 17.4 |
| 13                                              | 31  | R    | <b>28</b>    | <b>24.85</b> | <b>12.45</b> | <b>10.1</b>  | <b>3.26</b> | <b>3.4</b>  | <b>2.96</b> | <b>2.86</b> | <b>6.22</b> | <b>6.26</b> | 182             | 182  | 233           | 229        | 280           | 254        | 101.5         | 108          | 7.5            | 5.4  |
|                                                 |     | L    | <b>27</b>    | <b>26.05</b> | <b>9.3</b>   | <b>8.65</b>  | <b>3.34</b> | <b>3.3</b>  | <b>2.6</b>  | <b>2.58</b> | <b>6</b>    | <b>5.88</b> | 183             | 181  | 243           | 220        | <b>293</b>    | 273        | 104.5         | 106          | 5.3            | 7.7  |
| Upper limit of normative values (mean + 2.5 SD) |     |      | 15,7         |              | 7            |              | 2.47        |             | 2.35        |             | 4.57        |             | 206             |      | 255           |            | 283           |            | 110           |              | 26.4           |      |

**Table 2b. Evoked potential data.** SEP=Somatosensory Evoked Potential; pre=pre-treatment; post=post-treatment; R=right; L=Left; NR=no response; in bold: abnormal values; ND: not done

| ID                                              | AGE | SIDE | SEP LL (ms) |             |             |              |             |              |             |              | SEP UL (ms)  |              |              |              |              |              |             |             |              |             |
|-------------------------------------------------|-----|------|-------------|-------------|-------------|--------------|-------------|--------------|-------------|--------------|--------------|--------------|--------------|--------------|--------------|--------------|-------------|-------------|--------------|-------------|
|                                                 |     |      | N8          |             | N22         |              | P40         |              | N22-P40     |              | N9           |              | N13          |              | N20          |              | N9-N13      |             | N13-N20      |             |
|                                                 |     |      | pre         | post        | pre         | post         | pre         | post         | pre         | post         | pre          | post         | pre          | post         | pre          | post         | pre         | post        | pre          | post        |
| 1                                               | 24  | R    | 8           | 8.2         | 22.8        | 23.1         | <b>NR</b>   | <b>NR</b>    | ND          | ND           | 10.6         | 11           | <b>15.75</b> | <b>15.7</b>  | <b>24.15</b> | <b>25</b>    | <b>5.15</b> | <b>4.7</b>  | <b>8.4</b>   | <b>9.3</b>  |
|                                                 |     | L    | 8.2         | 8.2         | 23.1        | 23.1         | <b>NR</b>   | <b>NR</b>    | ND          | ND           | 10.45        | 10.65        | <b>14.8</b>  | <b>14.75</b> | <b>24.3</b>  | <b>24.4</b>  | <b>4.35</b> | 4.1         | <b>9.5</b>   | <b>9.7</b>  |
| 2                                               | 48  | R    | 8.5         | 8.2         | 23.9        | 23.9         | <b>49.8</b> | <b>48.5</b>  | <b>25.9</b> | <b>24.6</b>  | 10.7         | 10.5         | <b>15.15</b> | <b>14.8</b>  | 22.05        | 21.4         | <b>4.45</b> | 4.3         | 6.9          | 6.6         |
|                                                 |     | L    | 8.8         | 8.4         | 23.7        | 23.9         | <b>49.8</b> | <b>49</b>    | <b>26.1</b> | <b>25.1</b>  | 10.5         | 10.25        | <b>15.5</b>  | <b>14.45</b> | 21.4         | 21.3         | <b>5</b>    | 4.2         | 5.9          | 6.85        |
| 3                                               | 35  | R    | <b>10.8</b> | <b>10.5</b> | <b>29.8</b> | <b>29.8</b>  | <b>47</b>   | <b>48.3</b>  | 17.2        | 18.5         | <b>12.6</b>  | <b>12.2</b>  | <b>16.75</b> | <b>17.25</b> | 23           | <b>23.6</b>  | 4.15        | <b>5.05</b> | 6.25         | 6.35        |
|                                                 |     | L    | <b>10.2</b> | <b>10.5</b> | <b>29</b>   | <b>29.4</b>  | <b>46.8</b> | <b>47.7</b>  | 17.8        | 18.3         | <b>12.5</b>  | <b>12.05</b> | <b>16.9</b>  | <b>17.2</b>  | 23           | 23           | <b>4.4</b>  | <b>5.15</b> | 6.1          | 5.8         |
| 4                                               | 44  | R    | 10.1        | 9.7         | <b>25.6</b> | <b>25.4</b>  | <b>58.7</b> | <b>55.3</b>  | <b>33.1</b> | <b>29.9</b>  | 11           | 10.04        | <b>15.7</b>  | <b>14.6</b>  | 22.65        | 22.4         | <b>4.7</b>  | <b>4.56</b> | <b>6.95</b>  | <b>7.8</b>  |
|                                                 |     | L    | 9.8         | 9.3         | <b>26.2</b> | <b>25.1</b>  | <b>58.5</b> | <b>55.4</b>  | <b>32.3</b> | <b>30.3</b>  | 11           | 10.03        | <b>15.45</b> | <b>15.1</b>  | 22.25        | 21.7         | <b>4.45</b> | <b>5.07</b> | 6.8          | 6.6         |
| 5                                               | 45  | R    | <b>NR</b>   | <b>NR</b>   | <b>NR</b>   | <b>NR</b>    | <b>NR</b>   | <b>NR</b>    | ND          | ND           | 10.8         | 11           | <b>NR</b>    | <b>NR</b>    | <b>23.9</b>  | 24.2         | ND          | ND          | ND           | ND          |
|                                                 |     | L    | <b>NR</b>   | <b>NR</b>   | <b>NR</b>   | <b>NR</b>    | <b>NR</b>   | <b>NR</b>    | ND          | ND           | 11.1         | <b>11.25</b> | <b>NR</b>    | <b>NR</b>    | <b>24.2</b>  | 24.3         | ND          | ND          | ND           | ND          |
| 6                                               | 37  | R    | 9.7         | 9.9         | <b>26</b>   | <b>25.9</b>  | <b>NR</b>   | <b>NR</b>    | ND          | ND           | <b>11.25</b> | <b>11.5</b>  | <b>NR</b>    | <b>NR</b>    | <b>24.5</b>  | <b>24.6</b>  | ND          | ND          | ND           | ND          |
|                                                 |     | L    | 9.7         | <b>NR</b>   | <b>26.1</b> | <b>24.8</b>  | <b>NR</b>   | <b>NR</b>    | ND          | ND           | 11.15        | <b>11.4</b>  | <b>NR</b>    | <b>NR</b>    | <b>24.8</b>  | <b>24.6</b>  | ND          | ND          | ND           | ND          |
| 7                                               | 50  | R    | <b>NR</b>   | <b>NR</b>   | <b>NR</b>   | <b>30.4</b>  | <b>60.2</b> | <b>60.9</b>  | ND          | <b>30.5</b>  | <b>12.8</b>  | <b>12.85</b> | <b>NR</b>    | <b>NR</b>    | <b>26.45</b> | <b>26.2</b>  | ND          | ND          | ND           | ND          |
|                                                 |     | L    | <b>NR</b>   | <b>NR</b>   | <b>30.6</b> | <b>30.2</b>  | <b>60</b>   | <b>60</b>    | <b>29.4</b> | <b>29.8</b>  | <b>12.6</b>  | <b>12.25</b> | <b>NR</b>    | <b>17.25</b> | <b>25.5</b>  | <b>25.9</b>  | ND          | <b>5.0</b>  | ND           | <b>8.65</b> |
| 8                                               | 41  | R    | <b>NR</b>   | <b>NR</b>   | <b>28.3</b> | <b>27.6</b>  | <b>NR</b>   | <b>58.13</b> | ND          | <b>30.53</b> | <b>11.3</b>  | <b>11.3</b>  | <b>16.05</b> | <b>15.52</b> | <b>25.1</b>  | <b>24.95</b> | <b>4.75</b> | 4.22        | <b>9.05</b>  | <b>9.43</b> |
|                                                 |     | L    | <b>NR</b>   | <b>NR</b>   | <b>28.2</b> | <b>27.29</b> | <b>NR</b>   | <b>58.33</b> | ND          | <b>31.04</b> | 11           | 11.2         | <b>14.65</b> | <b>15.05</b> | <b>24.7</b>  | <b>24.74</b> | 3.65        | 3.85        | <b>10.05</b> | <b>9.69</b> |
| 9                                               | 28  | R    | 9.6         | 9           | <b>25.6</b> | 24.6         | <b>NR</b>   | <b>NR</b>    | ND          | ND           | 10.7         | 10.5         | 14.05        | <b>15.25</b> | <b>23.9</b>  | 22.8         | 3.35        | <b>4.75</b> | <b>9.85</b>  | <b>7.55</b> |
|                                                 |     | L    | 10          | 9.6         | <b>25.5</b> | 24.4         | <b>NR</b>   | <b>NR</b>    | ND          | ND           | 10.25        | 10.1         | <b>14.85</b> | 14.25        | 22.15        | 22.1         | <b>4.6</b>  | 4.15        | <b>7.3</b>   | <b>7.85</b> |
| 10                                              | 38  | R    | 9.6         | 9.1         | <b>26.3</b> | <b>25.3</b>  | <b>57.2</b> | <b>57.6</b>  | <b>30.9</b> | <b>32.3</b>  | 10.65        | 10.5         | <b>15.65</b> | <b>14.8</b>  | 22.8         | 23.2         | <b>5</b>    | 4.3         | <b>7.15</b>  | <b>8.4</b>  |
|                                                 |     | L    | 9.6         | 9.2         | <b>26</b>   | <b>25.6</b>  | <b>58.8</b> | <b>58.4</b>  | <b>32.8</b> | <b>32.8</b>  | 10.65        | 10.6         | <b>15.4</b>  | <b>15.65</b> | 23           | 23.25        | <b>4.75</b> | <b>5.05</b> | <b>7.6</b>   | <b>7.6</b>  |
| 11                                              | 37  | R    | 8.5         | 8.23        | 24.5        | 24.17        | <b>NR</b>   | <b>NR</b>    | ND          | ND           | 9.75         | 9.74         | <b>14.9</b>  | <b>15.1</b>  | 22.2         | 22.3         | <b>5.15</b> | <b>5.36</b> | <b>7.3</b>   | <b>7.2</b>  |
|                                                 |     | L    | 9.3         | 8.96        | <b>25.2</b> | <b>24.7</b>  | <b>NR</b>   | <b>NR</b>    | ND          | ND           | 9.8          | 9.6          | <b>14.4</b>  | <b>14.6</b>  | 22.8         | 22.4         | <b>4.6</b>  | <b>5</b>    | <b>8.4</b>   | <b>7.8</b>  |
| 12                                              | 64  | R    | 9.4         | 8.3         | 22.2        | 22.9         | <b>49.4</b> | <b>50.9</b>  | <b>27.2</b> | <b>28</b>    | 10.05        | 10.4         | <b>14.15</b> | 13.2         | 20.95        | 21.2         | 4.1         | 2.8         | 6.8          | <b>8</b>    |
|                                                 |     | L    | 8           | 7.9         | 21.5        | 22.2         | <b>48.5</b> | <b>48.5</b>  | <b>27</b>   | <b>26.3</b>  | 9.5          | 9.75         | 13.9         | 14.2         | 20.95        | 21.2         | 4.4         | <b>4.45</b> | <b>7.05</b>  | <b>7</b>    |
| 13                                              | 31  | R    | <b>NR</b>   | <b>NR</b>   | <b>NR</b>   | <b>NR</b>    | <b>NR</b>   | <b>NR</b>    | ND          | ND           | <b>12.1</b>  | <b>12.2</b>  | <b>16.3</b>  | <b>16.5</b>  | <b>25.8</b>  | <b>26.45</b> | 4.2         | 4.3         | <b>9.5</b>   | <b>9.95</b> |
|                                                 |     | L    | <b>NR</b>   | <b>NR</b>   | <b>NR</b>   | <b>NR</b>    | <b>NR</b>   | <b>NR</b>    | ND          | ND           | <b>12.1</b>  | <b>11.9</b>  | <b>16.8</b>  | <b>16.5</b>  | <b>25.9</b>  | <b>26.3</b>  | <b>4.7</b>  | <b>4.6</b>  | <b>9.1</b>   | <b>9.8</b>  |
| Upper limit of normative values (mean + 2.5 SD) |     |      | 10.16       |             | 24.63       |              | 42.91       |              | 20.16       |              | 11.21        |              | 14.3         |              | 22.46        |              | 4.33        |             | 6.95         |             |

**Table 3. Nerve conduction data.** pre=pre-treatment; post=post-treatment; R= Right; L= Left; SENS NCS= Sensory Nerve Conduction Studies; MOT NCS= Motor Nerve Conduction Studies; Lat= Latency; AMP= Amplitude; NCV= Nerve Conduction Velocity; NR= No Response; in bold =abnormal values

| D  | AGE | SIDE | SENS NCS (Sural Nerve) |           |             |             |             |           | MOT NCS (Peroneal Nerve) |             |            |            |             |             |
|----|-----|------|------------------------|-----------|-------------|-------------|-------------|-----------|--------------------------|-------------|------------|------------|-------------|-------------|
|    |     |      | LAT (ms)               |           | AMP(μV)     |             | NCV (m/s)   |           | LAT (MS)                 |             | AMP (μV)   |            | NCV (m/s)   |             |
|    |     |      | pre                    | post      | pre         | post        | pre         | post      | pre                      | post        | pre        | post       | pre         | post        |
| 1  | 24  | R    | 2.4                    | 2.65      | 23.7        | 23.5        | 58.3        | 52.8      | 3.8                      | 3.65        | 29.9       | 25.1       | 43.1        | 49.2        |
|    |     | L    | 2.45                   | 2.75      | 25.3        | 19.6        | 57.1        | 50.9      | 3.9                      | 3.3         | 26.1       | 24.1       | 44.6        | 43.5        |
| 2  | 48  | R    | 2.65                   | 2.9       | 22          | 21.7        | 52.8        | 49.3      | <b>5.65</b>              |             | 8.2        |            | 47.1        |             |
|    |     | L    | 2.7                    | 2.55      | 20.3        | 21          | 51.9        | 48.3      | 5.15                     | 5.4         | 8.9        | 4.3        | 54.5        | 49.6        |
| 3  | 35  | R    | 2.6                    | 2.65      | 11.4        | <b>6.6</b>  | 53.8        | 48.3      | 5.75                     | 3.65        | 6.2        | 7.4        | 42          | 38          |
|    |     | L    | 3.1                    | 2.95      | <b>9</b>    | <b>6</b>    | 45.2        | 44.5      | 4.85                     |             | 7.3        |            | 41.8        |             |
| 4  | 44  | R    | 2.5                    | 2.35      | <b>8</b>    | <b>4.4</b>  | 56          | 62.2      | 3.8                      | 4.2         | 6.4        | 3.8        | 44          | 42          |
|    |     | L    | 2.4                    | 2.35      | <b>9.8</b>  | <b>11.3</b> | 58.3        | 59.6      | 4.9                      |             | 2.6        |            | 43.7        |             |
| 5  | 45  | R    | 2.8                    | 2.3       | <b>9.9</b>  | 17.7        | 51.8        | 51.2      | 3.55                     | 4.3         | 4.2        | 1.1        | 42.4        | 40.7        |
|    |     | L    | 2.7                    | 2.35      | <b>10</b>   | 19.9        | 53.8        | 50.1      |                          | 4.15        |            | 1.9        |             | 42.2        |
| 6  | 37  | R    | 2.85                   | 2.65      | 14.6        | 14.3        | 49.1        | 47.1      | 4.55                     | 4.75        | 2.2        | 8.2        | 45.9        | 43.7        |
|    |     | L    | 2.5                    |           | 22.9        |             | 56          |           |                          |             |            |            |             |             |
| 7  | 50  | R    | 2.85                   | 2.55      | 15.3        | 15.3        | <b>41.5</b> | <b>42</b> | 4.55                     | 4.85        | 8.5        | 6          | <b>33.3</b> | <b>32.9</b> |
|    |     | L    | 2.5                    | 2.4       | 11.7        | 15.9        | 48          | 46.2      |                          | 4.85        |            | 6          |             | <b>33.1</b> |
| 8  | 41  | R    | 2.75                   | 3.35      | <b>9.3</b>  | <b>8.2</b>  | 54.5        | 41.8      | 3.95                     | 4.75        | 5.3        | 7.1        | 41.9        | 38.8        |
|    |     | L    | 2.9                    | 3.3       | <b>10.3</b> | <b>8.1</b>  | 50          | 42.4      |                          | 4.9         |            | 4.1        |             | 37.5        |
| 9  | 28  | R    | 2.3                    | 2.2       | 15.7        | 15          | 60.9        | 63.6      | 4.95                     | 3.35        | 5.5        | 7.9        | 43.1        | 45.6        |
|    |     | L    | 2.6                    |           | 9.9         |             | 53.7        |           |                          |             |            |            |             |             |
| 10 | 38  | R    | 2.75                   |           | 17.6        |             | 50.9        |           | 6.3                      | 5.3         | 10.6       | 5          | 42.2        | 43.5        |
|    |     | L    | 2.15                   | 2.6       | 21.4        | 14.7        | 60.5        | 53.8      |                          |             |            |            |             |             |
| 11 | 37  | R    | 2.35                   | 2.85      | <b>9.8</b>  | <b>11.1</b> | 59.6        | 49.1      | 4.55                     | 4.45        | 7.8        | 3.9        | 43.8        | 44.6        |
|    |     | L    | 2.45                   |           | <b>7.3</b>  |             | 57.1        |           |                          |             |            |            |             |             |
| 12 | 64  | R    | <b>NR</b>              | <b>NR</b> | <b>NR</b>   | <b>NR</b>   | <b>NR</b>   | <b>NR</b> | 4.2                      | 4.8         | <b>1.2</b> | <b>1.3</b> | 48.8        | 48          |
|    |     | L    | <b>NR</b>              | <b>NR</b> | <b>NR</b>   | <b>NR</b>   | <b>NR</b>   | <b>NR</b> |                          |             |            |            |             |             |
| 13 | 31  | R    | 2.75                   | 2.95      | 15.5        | 20.8        | 50.9        | 47.5      | <b>5.85</b>              | <b>6.25</b> | 2.4        | 3.5        | 24.3        | <b>22.5</b> |
|    |     | L    | 2.55                   | 3         | 19.3        | 24.8        | 54.9        | 46.7      | <b>6.75</b>              | <b>6.5</b>  | 2.3        | 3.4        | 25.2        | <b>24.6</b> |

**NORMATIVE VALUES**

|                                   | <b>Amp</b>   | <b>Lat</b>    | <b>NCV</b>    |
|-----------------------------------|--------------|---------------|---------------|
| <b>Peroneal Nerve</b>             |              |               |               |
| Upper limit (mean + 2SD)          |              |               |               |
| Range 23-35 y-o                   | 5.4 +/- 3    | 3.7 +/- 1.8   | 49.5 +/- 10.8 |
| Upper limit (mean + 2SD)          |              |               |               |
| Range 44-65 y-o                   | 5.0 +/- 2.6  | 3.7 +/- 1.4   | 48.3 +/- 9.2  |
| <b>Sural nerve</b>                |              |               |               |
| Upper limit (mean + 1SD)          |              |               |               |
| Range 23-35 y-o                   | 20.9 +/- 8.0 | 2.7 +/- 0.3   | 52.5 +/- 5.6  |
| Upper limit (mean + 1SD)          |              |               |               |
| Range 44-65 y-o                   | 17.2 +/- 6.7 | 2.8 +/- 0.3   | 51.1 +/- 1.3  |
| <b>Tibial Nerve</b>               |              |               |               |
| Upper limit (mean + 2SD)          | 5.8 +/- 3.8  | 3.96 +/- 2.00 | 48.5 +/- 7.2  |
| <b>Superficial Peroneal Nerve</b> |              |               |               |
| Upper limit (mean + 1SD)          |              |               |               |
| Age over 15 y-o                   | 13.9 +/- 4.6 | 2.24 +/- 0.49 | 47.3 +/- 3.4  |

**Table 4.** Spectroscopic and Diffusion Tensor Imaging data

| ID               | AGE | Spectroscopy  |               |             |             |               |               |               |               | Difusion Tensor Imaging |                 |
|------------------|-----|---------------|---------------|-------------|-------------|---------------|---------------|---------------|---------------|-------------------------|-----------------|
|                  |     | Myo/Cr        |               | NAA/Cho     |             | NAA/Cr        |               | Cho/Cr        |               | FA                      |                 |
|                  |     | PO            |               | PO          |             | PO            |               | PO            |               | CST                     |                 |
|                  |     | pre           | post          | pre         | post        | pre           | post          | pre           | post          | pre                     | post            |
| 1                | 24  | <b>0.8838</b> | <b>0.9046</b> | 2.10        | 2.65        | <b>1.6879</b> | <b>1.3367</b> | 0.8041        | 0.5043        | 0.515269                | <b>0.494690</b> |
| 2                | 48  | <b>0.8387</b> | 0.7861        | 2.32        | 2.41        | 1.7097        | <b>1.3668</b> | 0.7359        | 0.5661        | 0.529420                | 0.528411        |
| 3                | 35  | <b>1.0382</b> | <b>0.8109</b> | <b>1.31</b> | 1.74        | <b>1.6279</b> | <b>1.6218</b> | <b>1.2452</b> | <b>0.9345</b> | 0.554577                | 0.545326        |
| 4                | 44  | 0.7874        | <b>0.8153</b> | <b>3.54</b> | 1.73        | <b>1.6556</b> | 1.8241        | 0.4677        | <b>1.0514</b> | 0.512509                | 0.479226        |
| 5                | 45  | <b>0.9500</b> | <b>0.8596</b> | 1.52        | 1.89        | 2.0600        | <b>1.2682</b> | <b>1.3596</b> | 0.6696        | 0.522925                | 0.513929        |
| 6                | 37  | <b>0.9652</b> | <b>1.1509</b> | 1.76        | 1.45        | <b>1.4299</b> | <b>0.9899</b> | 0.8133        | 0.6818        | <b>0.497866</b>         | <b>0.4635</b>   |
| 7                | 50  | <b>0.9858</b> | <b>0.9693</b> | 2.16        | <b>1.20</b> | <b>1.4871</b> | <b>1.4559</b> | 0.6897        | <b>1.2145</b> | <b>0.492247</b>         | <b>0.477074</b> |
| 8                | 41  | 0.7809        | 0.7233        | 1.65        | 2.18        | <b>1.5551</b> | <b>1.3841</b> | <b>0.9416</b> | 0.6360        | 0.530123                | 0.526146        |
| 9                | 28  | 0.7474        | <b>0.8401</b> | <b>6.79</b> | 2.37        | <b>1.6173</b> | <b>1.6132</b> | <b>0.2382</b> | 0.6808        | 0.518413                | 0.512709        |
| 10               | 38  | <b>0.8376</b> | <b>1.0453</b> | 1.73        | <b>3.58</b> | 1.8619        | <b>1.4057</b> | <b>1.0754</b> | <b>0.3928</b> | <b>0.485787</b>         | <b>0.491679</b> |
| 11               | 37  | 0.7669        | <b>1.2308</b> | 2.68        | <b>4.66</b> | <b>1.6889</b> | <b>1.0735</b> | 0.6296        | <b>0.2306</b> | 0.554720                | 0.534809        |
| 12               | 64  | <b>1.0243</b> | <b>0.9385</b> | <b>3.25</b> | <b>3.14</b> | <b>1.5255</b> | <b>1.3483</b> | 0.4699        | 0.4298        | 0.531937                | 0.506943        |
| 13               | 31  | <b>0.9693</b> | <b>0.9111</b> | <b>1.20</b> | 1.70        | <b>1.4559</b> | <b>1.5715</b> | <b>1.2145</b> | <b>0.9258</b> | not done                | not done        |
| mean             |     | 0.8904        | 0.9220        | 2.4614      | 2.3611      | 1.6433        | 1.4046        | 0.8219        | 0.6860        | 0.5205                  | 0.5062          |
| SD               |     | 0.10          | 0.15          | 1.48        | 0.96        | 0.17          | 0.22          | 0.34          | 0.28          | 0.02                    | 0.03            |
| Normative values |     |               |               |             |             |               |               |               |               |                         |                 |
| mean             |     | 0.5700        |               | 2.2000      |             | 1.4400        |               | 0.6600        |               | 0.5700                  |                 |
| (mean +/- 3 SD)  |     | < 0.81        |               | 2.95-1.45   |             | > 1.800       |               | 0.42-0.90     |               | > 0.51                  |                 |

FA=Fractional anisotropy; CST= Corticospinal Tract; PO=Parieto-occipital white matter; in bold: abnormal values; in red: withdrawn from treatment; Myo: myo-inositol; Cre: creatine; Cho: choline; NAA: N-acetylaspartate

Normative values (spectroscopy): Garnett et al; Brain 2000;123 (Pt 7):1403-1409.

Normative values (DTI): Dubey et al; Ann Neurol 2005;58:758-766.
